# Supplementary material for: Identification and verification of potential piRNAs from domesticated yak testis
Source: PubMed Central journal article supplement (PMC5763474; doi:10.1530/rep-17-0592), 2017-11-03

## The percentage of candidate piRNA first residue

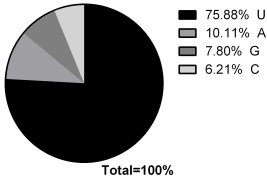

Supplement: rep-155-117-s002.pdf [file rep-155-117-s002.pdf]
